# Supplementary material for: Oxidized Low-Density Lipoprotein Promotes In Vitro Calcification
Source: PubMed Central journal article supplement (PMC7697660; doi:10.3390/ma13225120), 2020-11-13
Supplement: materials-13-05120-s001.pdf [file materials-13-05120-s001.pdf]

Supplementary Materials

# Oxidized Low-Density Lipoprotein Promotes *in vitro* Calcification

Mamiko Yamashita <sup>1</sup>, Yoshiaki Nomura <sup>1,\*</sup>, Misao Ishikawa <sup>2</sup>, Shinji Shimoda <sup>2</sup> and Nobuhiro Hanada <sup>1</sup>

<sup>1</sup> Department of Translational Research, Tsurumi University School of Dental Medicine, Yokohama 230-8501, Japan; yamashita-m@tsurumi-u.ac.jp (M.Y.); hanada-n@tsurumi-u.ac.jp (N.H.)

<sup>2</sup> Department of Oral Anatomy, Tsurumi University School of Dental Medicine, Yokohama 230-8501, Japan; ishikawa-misao@tsurumi-u.ac.jp (M.I.); shimoda-s@tsurumi-u.ac.jp (S.S.)

\* Correspondence: nomura-y@tsurumi-u.ac.jp

Received: 16 October 2020; Accepted: 11 November 2020; Published: date

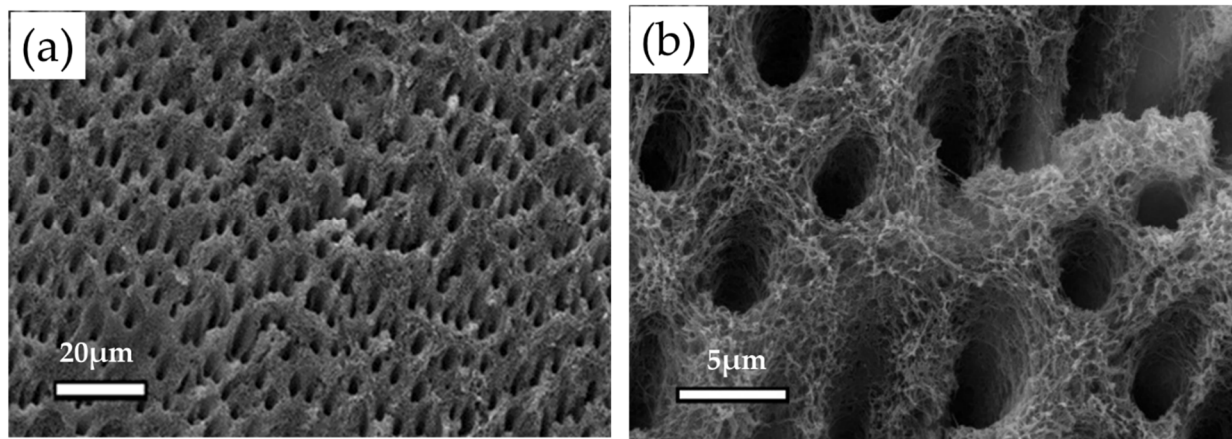

**Figure 1.** Decalcified bovine dentin as observed by scanning electron microscopy. (a) 20 μm; (b) 5 μm. The apatite crystals were not observed between dentin matrix collagen fibers.

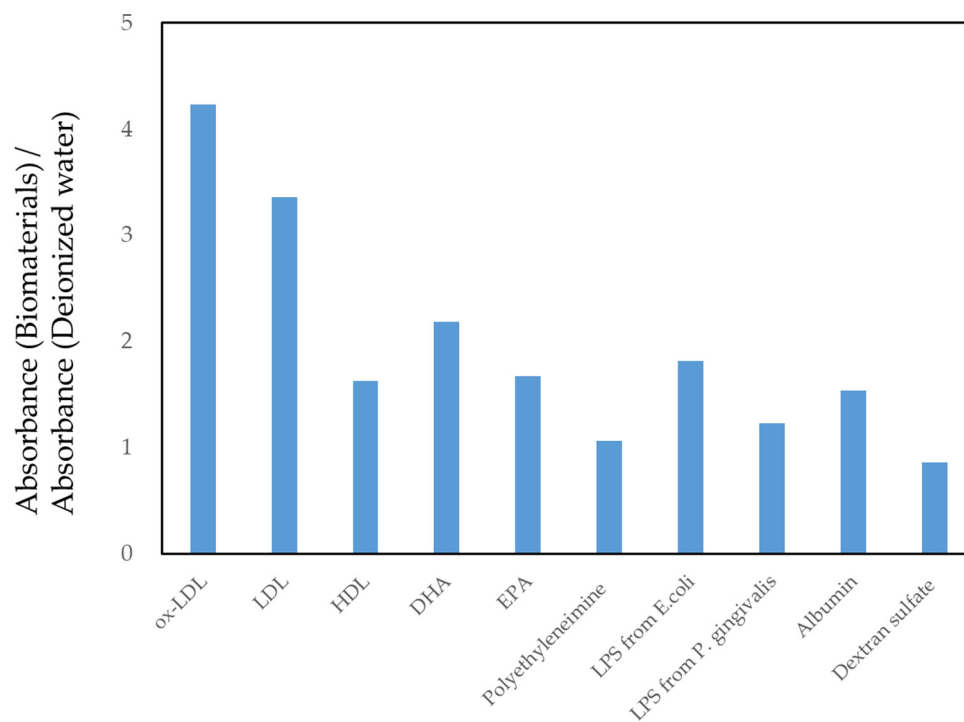

**Figure S2.** Relative absorbance of the solutions containing biomaterials. Absorbances of the solutions of biomaterials were divided by that of deionized water. Solution containing ox-LDL was highest and 4.2 times that of deionized water. Absorbance obtained by 4.86mM calcium, 2.71mM phosphate and 0.025% biomaterials.

(A)

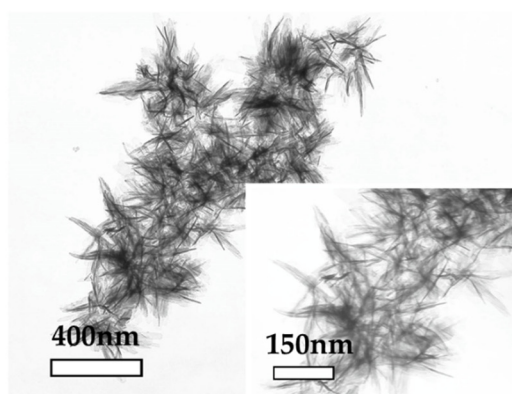

(B)

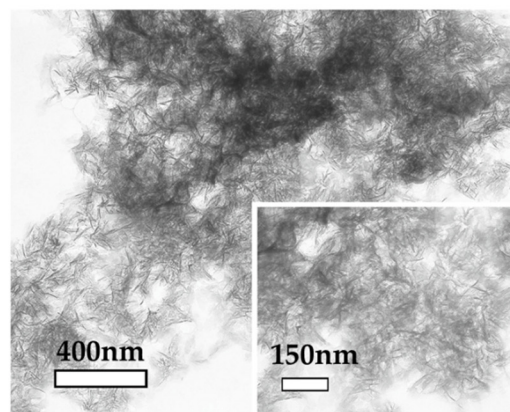

**Figure S3.** Crystal Shape in the Solution Containing albumin and dextran after 24 h reaction.(A) Albumin (B) Dextran sulfate.

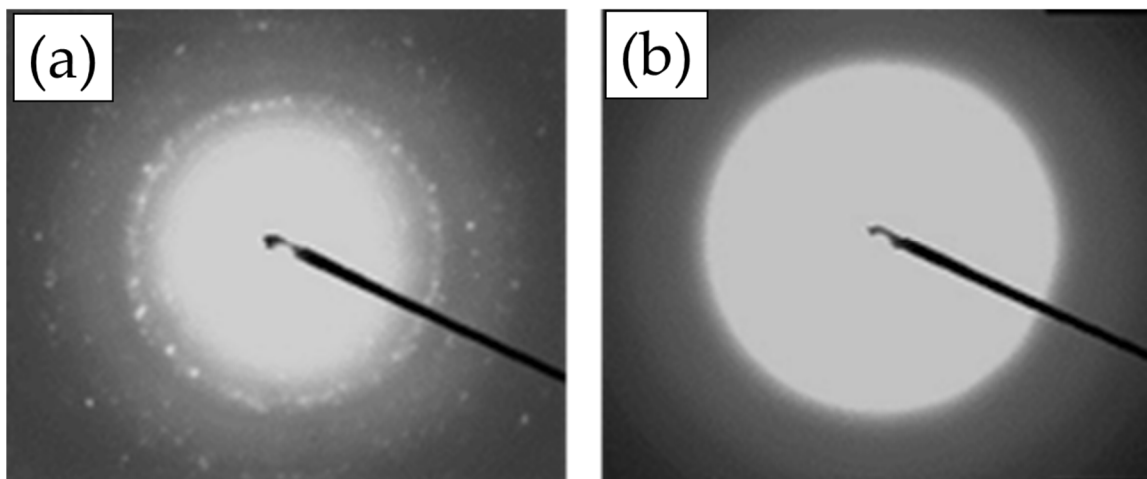

**Figure 4.** Selected area of electron diffraction pattern.(a): Diffraction spots obtained from hydroxyapatite crystal.(b): Halo pattern obtained from the oval shaped precipitates.

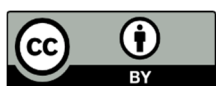

© 2020 by the authors. Submitted for possible open access publication under the terms and conditions of the Creative Commons Attribution (CC BY) license (<http://creativecommons.org/licenses/by/4.0/>).
